# Supplementary material
Source: MDPI journal article supplement (https://www.mdpi.com/2075-5309/8/7/90)
Supplement: s1 [file s1]

## Supplementary 1

## Survey for the sample of 280 dwellings

| HYGROTHERMAL COMFORT                                                                     |                      |                      |
|------------------------------------------------------------------------------------------|----------------------|----------------------|
| <b>1 Considers that your home is:</b>                                                    |                      |                      |
| 1. Very cold                                                                             | <input type="text"/> |                      |
| 2. Something cold                                                                        | <input type="text"/> |                      |
| 3. Cool                                                                                  | <input type="text"/> |                      |
| 4. Something warm                                                                        | <input type="text"/> |                      |
| 5. Very warm                                                                             | <input type="text"/> |                      |
| <b>2 At what time of day?</b>                                                            |                      |                      |
| 1. Morning                                                                               | <input type="text"/> |                      |
| 2. Afternoon                                                                             | <input type="text"/> |                      |
| 3. Night                                                                                 | <input type="text"/> |                      |
| <b>3 Do you feel drafts inside in your home?</b>                                         |                      |                      |
| 1. Yes                                                                                   | <input type="text"/> |                      |
| 2. No                                                                                    | <input type="text"/> |                      |
| HEARING COMFORT                                                                          |                      |                      |
| <b>4 Inside your houses, how do you hear the noises of the street?</b>                   |                      |                      |
| 1. Very Loud                                                                             | <input type="text"/> |                      |
| 2. Loud                                                                                  | <input type="text"/> |                      |
| 3. Quiet                                                                                 | <input type="text"/> |                      |
| 4. Very quiet                                                                            | <input type="text"/> |                      |
| 5. Not heard                                                                             | <input type="text"/> |                      |
| <b>5 How do you hear the sounds of the continuous floor, top or bottom?</b>              |                      |                      |
| 1. Very Loud                                                                             | <input type="text"/> |                      |
| 2. Loud                                                                                  | <input type="text"/> |                      |
| 3. Quiet                                                                                 | <input type="text"/> |                      |
| 4. Very quiet                                                                            | <input type="text"/> |                      |
| 5. Not heard                                                                             | <input type="text"/> |                      |
| AIR QUALITY                                                                              |                      |                      |
| <b>6 What kind of mechanism does it use for the ventilation of the dwelling?</b>         |                      |                      |
| 1. Open the door                                                                         |                      |                      |
| 2. Open the window                                                                       |                      |                      |
| 3. Mechanical ventilation (fan, air conditioning)                                        |                      |                      |
| 4. Others (Especify) _____                                                               |                      |                      |
| <b>7 Do you feel bad odors in your home due to contamination or lack of ventilation?</b> |                      |                      |
| 1. Yes (Especify) _____                                                                  |                      |                      |
| 2. No                                                                                    |                      | <input type="text"/> |

## Supplementary 2

Sample of the survey applied to the case studies

**C4. THERMAL CONFORT****11. How satisfied are you with the temperature in your room? \***

|                   |   |   |   |   |   |                     |
|-------------------|---|---|---|---|---|---------------------|
| 1. Very Satisfied |   |   |   |   |   | Very unsatisfied 7. |
| 1                 | 2 | 3 | 4 | 5 | 6 | 7                   |

**11.1 \* If the answer to question 11 is between 5 and 7:**

**You have indicated that you are dissatisfied with the temperature in your room. Which of the following factors contribute to your dislike?**

**In a hot weather, the temperature of your bedroom is:**

- a. Often too hot
- b. Often too cold

|  |
|--|
|  |
|  |

**In a hot weather**

- a. My hands are very cold
- b. My feet are very cold

|  |
|--|
|  |
|  |

**In a cold weather, the temperature of your bedroom is**

- a. Often too hot
- b. Often too cold

|  |
|--|
|  |
|  |

**In a cold weather**

- a. My hands are very cold
- b. My feet are very cold

|  |
|--|
|  |
|  |

**C4. INDOOR AIR QUALITY****13. How satisfied are you with the quality of air in your room (e.g.: poorly ventilated, stale air, cleaning, odors?)**

|                   |   |   |   |   |   |                     |
|-------------------|---|---|---|---|---|---------------------|
| 1. Very Satisfied |   |   |   |   |   | Very unsatisfied 7. |
| 1                 | 2 | 3 | 4 | 5 | 6 | 7                   |

**13.1 \* If the answer to question 13 is between 5 and 7:**

**You have indicated that you are dissatisfied with the air quality in your room. Which of the following problems contribute to your dissatisfaction?**

**The air is suffocating/stagnant**

- a. Minor problema
- b. It's no problem
- c. Major problem

|  |
|--|
|  |
|  |
|  |

**The air isn't clean**

- a. Minor problema
- b. It's no problem
- c. Major problem

|  |
|--|
|  |
|  |
|  |

**The air smells bad**

- a. Minor problema
- b. It's no problem
- c. Major problem

|  |
|--|
|  |
|  |
|  |

**C5. ILUMINATION**

17. How satisfied are you with the amount of lighting in your bedroom?

|                   |   |   |   |   |   |                     |
|-------------------|---|---|---|---|---|---------------------|
| 1. Very Satisfied |   |   |   |   |   | Very unsatisfied 7. |
| 1                 | 2 | 3 | 4 | 5 | 6 | 7                   |

17.1 \* If the answer to question 17 is between 5 and 7:

You have indicated that you are dissatisfied with the lighting in your room. Which of the following problems contribute to your dissatisfaction?

|                                                                      |  |
|----------------------------------------------------------------------|--|
| a. Very dark                                                         |  |
| b. Very bright                                                       |  |
| c. There is not enough natural lighting                              |  |
| d. Too much natural light                                            |  |
| e. There is not enough electric lighting                             |  |
| f. Too much electrical lighting                                      |  |
| g. Electric lighting flashes                                         |  |
| h. The electric lighting is of an unpleasant color                   |  |
| i. There is no lighting in the workplace                             |  |
| j. Reflections on shiny surfaces (glass, computer screens / TV, etc) |  |
| k. Shadows                                                           |  |
| l. Others                                                            |  |

**C6. QUALITY OF ACOUSTICS**

21. How satisfied are you with acoustic privacy between homes? (ability to have conversations without neighbors hearing by chance or vice versa)

|                   |   |   |   |   |   |                     |
|-------------------|---|---|---|---|---|---------------------|
| 1. Very Satisfied |   |   |   |   |   | Very unsatisfied 7. |
| 1                 | 2 | 3 | 4 | 5 | 6 | 7                   |

**C8. SYMPTOMS RELATED TO HOUSING**

29. When you are in the room, do you frequent symptoms (for example: tiredness, headache, eye irritation, stuffy nose, dry throat, itchy skin) that disappear after leaving the room?

|        |  |
|--------|--|
| a. Yes |  |
| b. No  |  |

Skip to question 33.

**C9. GENERAL COMMENTS**

33. Considering all aspects, how satisfied are you with the comfort of your home?

|                   |   |   |   |   |   |                     |
|-------------------|---|---|---|---|---|---------------------|
| 1. Very Satisfied |   |   |   |   |   | Very unsatisfied 7. |
| 1                 | 2 | 3 | 4 | 5 | 6 | 7                   |

## E1. THERMAL ENVIRONMENT POINT-IN-TIME SURVEY

1. Record the approximate outside air temperature \_\_\_\_\_ and seasonal conditions:

☐ Winter ☐ Spring ☐ Summer ☐ Fall

2. What is your general thermal sensation? (Check the one that is most appropriate)

*(Note to survey designer: This scale must be used as-is to keep the survey consistent with ASHRAE Standard 55.)*

- ☐ Hot  
☐ Warm  
☐ Slightly Warm  
☐ Neutral  
☐ Slightly Cool  
☐ Cool  
☐ Cold

3. Either (a) place an "X" in the appropriate place where you are located now:

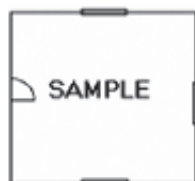

*(Note to survey designer: Provide appropriate sketch for your space or building.)*

- or (b) place an "X" in the check box that best describes the area of the building where you are located now.

- ☐ North  
☐ East  
☐ South  
☐ West  
☐ Core  
☐ Don't know

4. On which floor of the building are you located now?

- ☐ 1st  
☐ 2nd  
☐ 3rd  
☐ Other (provide the floor number): \_\_\_\_\_

5. Are you near an exterior wall (within 15 ft)?

- ☐ Yes  
☐ No

6. Are you near a window (within 15 ft)?

- ☐ Yes  
☐ No

7. Using the list below, please check each item of clothing that you are wearing right now. (Check all that apply):

*(Note to survey designer: This list can be modified at your discretion.)*

- |                                                 |                                                 |                                  |
|-------------------------------------------------|-------------------------------------------------|----------------------------------|
| <input type="checkbox"/> Short-Sleeve Shirt     | <input type="checkbox"/> Dress                  | <input type="checkbox"/> Nylons  |
| <input type="checkbox"/> Long-Sleeve Shirt      | <input type="checkbox"/> Shorts                 | <input type="checkbox"/> Socks   |
| <input type="checkbox"/> T-shirt                | <input type="checkbox"/> Athletic Sweatpants    | <input type="checkbox"/> Boots   |
| <input type="checkbox"/> Long-Sleeve Sweatshirt | <input type="checkbox"/> Trousers               | <input type="checkbox"/> Shoes   |
| <input type="checkbox"/> Sweater                | <input type="checkbox"/> Undershirt             | <input type="checkbox"/> Sandals |
| <input type="checkbox"/> Vest                   | <input type="checkbox"/> Long Underwear Bottoms |                                  |
| <input type="checkbox"/> Jacket                 | <input type="checkbox"/> Long Sleeve Coveralls  |                                  |
| <input type="checkbox"/> Knee-Length Skirt      | <input type="checkbox"/> Overalls               |                                  |
| <input type="checkbox"/> Ankle-Length Skirt     | <input type="checkbox"/> Slip                   |                                  |

- ☐ Other: (Please note if you are wearing something not described above, or if you think something you are wearing is especially heavy.) \_\_\_\_\_

8. What is your activity level right now? (Check the one that is most appropriate)

- ☐ Reclining  
☐ Seated  
☐ Standing relaxed  
☐ Light activity standing  
☐ Medium activity standing  
☐ High activity

Figure X1 Thermal Environment Point-in-Time Survey
